# Supplementary material for: Temperature- and pH-responsive properties of poly(vinylidene fluoride) membranes functionalized by blending microgels
Source: Royal Society of Chemistry journal article supplement (doi:10.1039/c4ra02724h), 2014-05-29
Supplement: c4ra02724h1.pdf [file c4ra02724h1.pdf]

Electronic Supplementary Information for

**Temperature- and pH-responsive properties of poly (vinylidene fluoride) membranes functionalized by blending microgels**

Xi Chen<sup>\*a,b</sup> Bowu Zhao<sup>a,b</sup> Lizhi Zhao<sup>\*a,b</sup> Shiyin Bi<sup>a,b</sup> Peng Han<sup>a,b</sup> Xia Feng<sup>a,b</sup> Li Chen<sup>a,b</sup>

<sup>a</sup> School of Materials Science and Engineering, Tianjin Polytechnic University, Tianjin 300387, PR

China

<sup>b</sup> State Key Laboratory of Hollow Fiber Membrane Materials and Processes, Tianjin Polytechnic University, Tianjin 300387, PR China

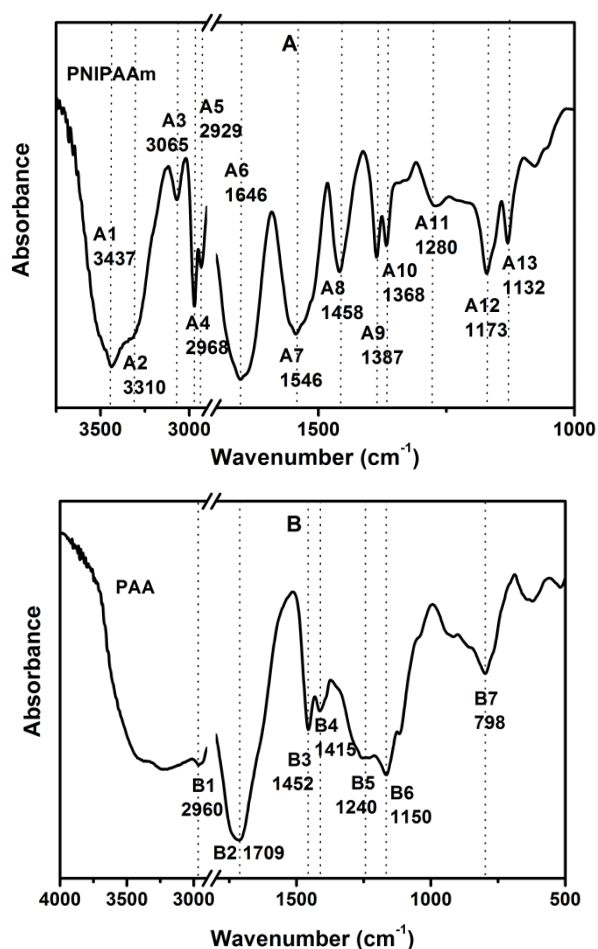

Fig. 1S. FTIR spectra of PNIPAAm and PAA microgels.

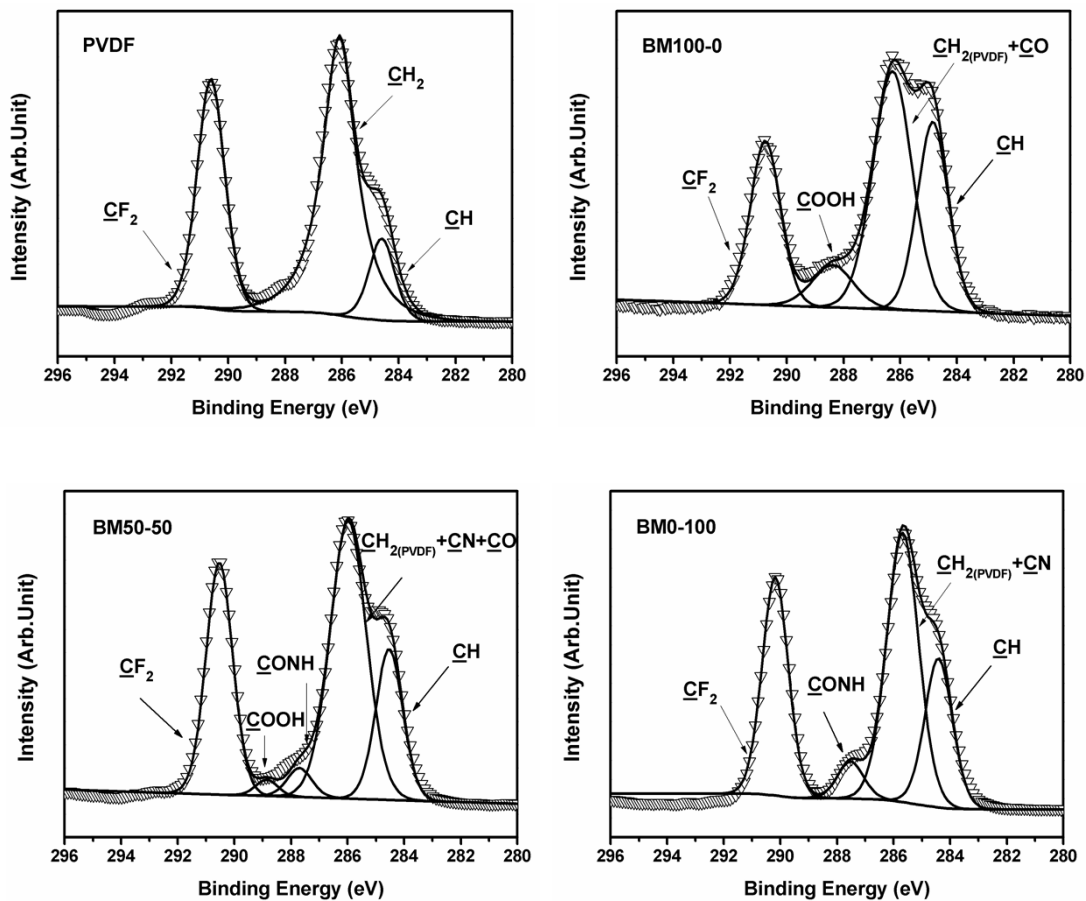

**Fig. 2S.** XPS C1s core-level spectra of the pure PVDF membrane, BM100-0, BM50-50 and BM0-100 blend membranes.
